# Supplementary material
Source: publisher site journal article supplement (https://www.dovepress.com/article/256484)
Supplement: Supplementary file 1 [file get_supplementary_file.php]

Supplemental Table 1. Differential analysis of thrombus in different treatment groups

| group | VTEc(+)(*n*=77) | VTE(-)(*n*=523) |
| --- | --- | --- |
| Regular anticoagulation day 1 after surgeryd(%) | 5a,b(9.3) | 49a,b(90.7) |
| Limb compression therapy(%) | 47a,b(13.6) | 298a,b(86.4) |
| Early systemic thromboprophylaxis(%) | 12b(8.3) | 132b(91.7) |
| Non-treatment(%) | 13a(22.8) | 44a(77.2) |

Note: Different subscript letters denote the statistical differences between different treatment groups in the comparison of thrombus group and nonthrombus group (*P* < .008).

c VTE, venous thromboembolism.

d From the first day after surgery, nadroparin calcium was injected subcutaneously on a regular basis (at least 0.4 mL daily).
